# Supplementary material for: Sexually-dimorphic neurons in the Drosophila whole-brain connectome
Source: Research Square preprint supplement (doi:10.21203/rs.3.rs-6881911/v1), 2025-06-26
Supplement: Supplementary file 1 [file 602b5cfaa9441fa7c44ec8bc.xlsx]

## Sheet: Sheet1
Figure	panel	Neuroglancer (FlyWire) link
1A	aDT10, middle	https://ngl.flywire.ai/?json_url=https://globalv1.flywire-daf.com/nglstate/5514103792599040
	aDT10, right	https://ngl.flywire.ai/?json_url=https://globalv1.flywire-daf.com/nglstate/5089761258635264
	aDT5, middle	https://ngl.flywire.ai/?json_url=https://globalv1.flywire-daf.com/nglstate/4737917537746944
	aDT5a	https://ngl.flywire.ai/?json_url=https://globalv1.flywire-daf.com/nglstate/6527378617532416
	aDT5b	https://ngl.flywire.ai/?json_url=https://globalv1.flywire-daf.com/nglstate/5524721455071232
	pMP6	https://ngl.flywire.ai/?json_url=https://globalv1.flywire-daf.com/nglstate/5252201753608192
	pMP6-CB1566	https://ngl.flywire.ai/?json_url=https://globalv1.flywire-daf.com/nglstate/6432801155973120
	pMP6-CB2680	https://ngl.flywire.ai/?json_url=https://globalv1.flywire-daf.com/nglstate/6726640102014976
	pMP6-CRE082	https://ngl.flywire.ai/?json_url=https://globalv1.flywire-daf.com/nglstate/5145355080433664
1S2A	aDT6a-CB3695, CB1749	https://ngl.flywire.ai/?json_url=https://globalv1.flywire-daf.com/nglstate/5753130399563776
1S2B	aIP1	https://ngl.flywire.ai/?json_url=https://globalv1.flywire-daf.com/nglstate/6456600844828672
1S2C	pMP3-pCd1	https://ngl.flywire.ai/?json_url=https://globalv1.flywire-daf.com/nglstate/5531886718812160
1S2D	pMP5-pCd2	https://ngl.flywire.ai/?json_url=https://globalv1.flywire-daf.com/nglstate/5978928641474560
6B	pC2l	https://ngl.flywire.ai/?json_url=https://globalv1.flywire-daf.com/nglstate/5782672835084288
6E	pMN1-DNp13	https://ngl.flywire.ai/?json_url=https://globalv1.flywire-daf.com/nglstate/6502624976175104
	pIP9	https://ngl.flywire.ai/?json_url=https://globalv1.flywire-daf.com/nglstate/5994824047001600
7G	pSP9	https://ngl.flywire.ai/?json_url=https://globalv1.flywire-daf.com/nglstate/5219532420415488
7H	aSP8	https://ngl.flywire.ai/?json_url=https://globalv1.flywire-daf.com/nglstate/6237535064817664
	aIP1	https://ngl.flywire.ai/?json_url=https://globalv1.flywire-daf.com/nglstate/4942068003635200
7I
8B	Left	https://ngl.cave-explorer.org/#!middleauth+https://global.daf-apis.com/nglstate/api/v1/5652449487486976
	Middle	https://ngl.cave-explorer.org/#!middleauth+https://global.daf-apis.com/nglstate/api/v1/4957703530086400
	Right	https://ngl.cave-explorer.org/#!middleauth+https://global.daf-apis.com/nglstate/api/v1/5793120571621376
8C	Left	https://ngl.cave-explorer.org/#!middleauth+https://global.daf-apis.com/nglstate/api/v1/5127256725782528
	Middle	https://ngl.cave-explorer.org/#!middleauth+https://global.daf-apis.com/nglstate/api/v1/6664846427815936
	Right	https://ngl.cave-explorer.org/#!middleauth+https://global.daf-apis.com/nglstate/api/v1/4709143337238528
